# Supplementary material for: High rate of attention deficit hyperactivity disorder among children 6 to 17 years old in Southwest Ethiopia findings from a community-based study
Source: Springer Nature journal article supplement (doi:10.1186/s12888-023-04636-9), 2023-03-08
Supplement: MOESM1 [file 24601134]

**Table S1: A bivariable binary logistic regression model of factors associated with ADHD among children aged 6-17 year in Jimma town, southwest Ethiopia, 2021**

| Variable                                       | Categories               | ADHD      |            | COR & 95% CI     | P Value |
|------------------------------------------------|--------------------------|-----------|------------|------------------|---------|
|                                                |                          | Yes       | No         |                  |         |
| <b>child's sex</b>                             | Male                     | 33(11.7%) | 249(88.3%) | 1.60(0.86-2.95)  | 0.13*   |
|                                                | Female                   | 17(7.7%)  | 205(92.3%) | 1                | 1       |
| <b>Child's age</b>                             | 6-11                     | 39(16.9%) | 192(83.1%) | 4.83(2.42-9.70)  | <0.001* |
|                                                | 12-17                    | 11(4.0%)  | 262(96.0%) | 1                | 1       |
| <b>Child's level of education</b>              | unable to read and write | 1(7.1%)   | 13(92.9%)  | 1                | 1       |
|                                                | Primary school and above | 49(10%)   | 441(90.0%) | 1.44(0.18-11.28) | 0.73    |
| <b>With whom the child is living</b>           | with family              | 47(9.7%)  | 437(90.3%) | 1                | 1       |
|                                                | Others                   | 3(15.0%)  | 17(85.0%)  | 1.64(0.46-5.80)  | 0.44    |
| <b>current living circumstance of parent's</b> | both are alive           | 41(10.3%) | 359(89.8%) | 1                | 1       |
|                                                | only mother alive        | 5(6.2%)   | 76(93.8%)  | 0.58(0.22-1.51)  | 0.26    |
|                                                | only father alive        | 2(20.0%)  | 8(80.0%)   | 2.20(0.45-10.66) | 0.33    |
|                                                | both are died            | 2(15.4%)  | 11(84.6%)  | 1.59(0.34-7.43)  | 0.55    |
| <b>Family size</b>                             | 1-4                      | 17(6.9%)  | 228(93.1%) | 1                | 1       |
|                                                | 4 and above              | 33(12.7%) | 226(87.3%) | 1.958(1.06-3.61) | 0.032*  |
| <b>father's occupation</b>                     | government employee      | 12(7.0%)  | 160(93.0%) | 1                | 1       |
|                                                | Merchant                 | 16(11.1%) | 128(88.9%) | 1.667(0.76-3.65) | 0.20*   |
|                                                | Farmer                   | 8(16.0%)  | 42(84.0%)  | 2.540(0.97-6.61) | 0.06*   |
|                                                | daily laborer            | 11(14.1%) | 62(85.9%)  | 2.19(0.92-5.20)  | 0.08*   |

|                                      |                            |           |            |                   |         |
|--------------------------------------|----------------------------|-----------|------------|-------------------|---------|
|                                      | Others                     | 3(5.0%)   | 57(95.0%)  | 0.70(0.19-2.57)   | 0.59    |
| <b>Mother's occupation</b>           | house wife                 | 25(10.3%) | 218(89.7%) | 1                 | 1       |
|                                      | Merchant                   | 5(6.3%)   | 74(93.7%)  | 0.59(0.22-1.59)   | 0.30    |
|                                      | government employee        | 8(5.8%)   | 129(94.2%) | 0.54(0.24-1.23)   | 0.144*  |
|                                      | daily laborer              | 12(26.7%) | 33(73.3%)  | 3.17(1.45-6.91)   | .004*   |
| <b>Father's educational status</b>   | unable to read and write   | 7(18.9%)  | 30(81.1%)  | 3.66(1.92-6.98)   | <0.001* |
|                                      | primary school             | 26(17.2%) | 125(82.8%) | 4.10(1.58-10.68)  | .004*   |
|                                      | secondary school and above | 17(3.37%) | 299(59.3%) | 1                 | 1       |
| <b>mother's educational status</b>   | unable to read and write   | 19(23.5%) | 62(76.5%)  | 6.87 (3.17-14.89) | <0.001* |
|                                      | primary school             | 19(13.4%) | 123(86.6%) | 3.46(1.63-7.36)   | .001*   |
|                                      | secondary school and above | 12(4.3%)  | 269(95.7%) | 1                 | 1       |
| <b>Maternal age during pregnancy</b> | 17-24                      | 10(6.4%)  | 146(93.6%) | 0.53(0.26-1.08)   | 0.08*   |
|                                      | 25 and above               | 40(11.5%) | 308(88.5%) | 1                 | 1       |
| <b>child's birth order</b>           | first child                | 18(6.5%)  | 258(93.5%) | 1                 | 1       |
|                                      | second child and above     | 32(14.0%) | 196(86.0%) | 2.34 (1.28-4.29)  | 0.006*  |
| <b>Family income</b>                 | Below poverty line         | 21(14.1%) | 128(85.9%) | 1.84(1.02-3.35)   | 0.045*  |
|                                      | Above poverty line         | 29(8.2%)  | 326(91.8%) | 1                 | 1       |
| <b>parent marital</b>                | Married                    | 40(10.2%) | 352(89.8%) | 1                 | 1       |

|                                                           |                    |            |            |                   |         |
|-----------------------------------------------------------|--------------------|------------|------------|-------------------|---------|
| <b>status</b>                                             | divorced/separated | 5(12.5%)   | 35(87.5%)  | 1.26(0.47-3.39)   | 0.65    |
|                                                           | Widowed            | 5(6.9%)    | 67(93.1%)  | 0.66(0.25-1.73)   | 0.39    |
| <b>family type</b>                                        | nuclear family     | 48(10.2%)  | 423(89.8%) | 1                 | 1       |
|                                                           | extended family    | 2(6.1%)    | 31(93.9%)  | 0.57(0.13-2.45)   | 0.45    |
| <b>family history of mental illness</b>                   | No                 | 421(90.1%) | 4(10.8%)   | 1                 | 1       |
|                                                           | Yes                | 33(89.2%)  | 46(9.9%)   | 1.11 (0.38-3.27)  | 0.851   |
| <b>Child-health status before 6 years</b>                 | Healthy            | 393(93.6%) | 27(6.4%)   | 1                 | 1       |
|                                                           | Sick               | 61(72.6%)  | 23(27.4%)  | 5.49 (2.96-10.18) | <0.001* |
| <b>Maternal complication during pregnancy</b>             | No                 | 418(92.7%) | 33(7.3%)   | 1                 | 1       |
|                                                           | Yes                | 36(67.9%)  | 17(32.1%)  | 5.98(3.04-11.77)  | <0.001* |
| <b>Duration of pregnancy</b>                              | Preterm            | 96(82.8%)  | 20(17.2%)  | 2.49(1.35-4.57)   | 0.003*  |
|                                                           | Full term          | 358(92.3%) | 30(7.7%)   | 1                 | 1       |
| <b>complication at delivery</b>                           | No                 | 417(92.7%) | 33(7.3%)   | 1                 | 1       |
|                                                           | Yes                | 37(68.5%)  | 17(31.5%)  | 5.81(2.96-11.40)  | <0.001* |
| <b>History of head trauma for children and adolescent</b> | No                 | 434(92.9%) | 33(7.1%)   | 1                 | 1       |
|                                                           | Yes                | 20(54.1%)  | 17(45.9%)  | 11.18(5.35-23.36) | <0.001* |
| <b>Child feeding style during first six month</b>         | breast feeding     | 421(93.1%) | 31(6.9%)   | 1                 | 1       |
|                                                           | Bottle feeding     | 33(63.5%)  | 19(36.5%)  | 7.82(3.99-15.31)  | <0.001* |
| <b>Child's chronic physical illness</b>                   | No                 | 431(90.5%) | 45(9.5%)   | 1                 | 1       |
|                                                           | Yes                | 23(82.1%)  | 5(17.9%)   | 2.08(0.75-5.74)   | 0.157*  |

|                                                |                              |            |           |                  |         |
|------------------------------------------------|------------------------------|------------|-----------|------------------|---------|
| <b>Maternal health status during pregnancy</b> | Healthy                      | 402(92.4%) | 33(7.6%)  | 1                | 1       |
|                                                | Sick                         | 52(75.4%)  | 17(24.6%) | 3.98(2.07-7.65)  | <0.001* |
| <b>Bleeding</b>                                | No                           | 427(92.4%) | 35(7.6%)  | 1                | 1       |
|                                                | Yes                          | 27(64.3%)  | 15(35.7%) | 6.78(3.30-13.91) | <0.001* |
| <b>Pre-eclampsia</b>                           | No                           | 433(90.4%) | 46(9.6%)  | 1                | 1       |
|                                                | Yes                          | 21(84.0%)  | 4(16.0%)  | 1.79(0.59-5.45)  | 0.303   |
| <b>Diabetes mellitus</b>                       | No                           | 447(90.1%) | 49(9.9%)  | 1                | 1       |
|                                                | Yes                          | 7(87.5%)   | 1(12.5%)  | 1.30(0.16-10.81) | 0.806   |
| <b>Sexual transmitted infection</b>            | No                           | 447(90.3%) | 48(9.7%)  | 1                | 1       |
|                                                | Yes                          | 7(77.8%)   | 2(22.2%)  | 2.66(0.54-13.17) | .230*   |
| <b>Mode of delivery</b>                        | spontaneous vaginal delivery | 305(93.6%) | 21(6.4%)  | 1                | 1       |
|                                                | vaginal birth after oxytocin | 67(83.8%)  | 13(16.3%) | 2.82(1.34-5.91)  | .006*   |
|                                                | Episiotomy                   | 13(72.2%)  | 5(27.8%)  | 5.59(1.82-17.16) | .003*   |
|                                                | Instrumental delivery        | 24(85.7%)  | 4(14.3%)  | 2.42(0.77-7.62)  | 0.131*  |
|                                                | Cesarean section             | 45(86.5%)  | 7(13.5%)  | 2.26(0.91-5.62)  | 0.08*   |
| <b>child cried soon after delivery</b>         | No                           | 187(91.7%) | 17(8.3%)  | 0.74(0.40-1.36)  | 0.33    |
|                                                | Yes                          | 267(89.0%) | 33(11.0%) | 1                | 1       |
| <b>Mother's exposure to insecticide</b>        | No                           | 444(90.2%) | 48(9.8%)  | 1                | 1       |
|                                                | Yes                          | 10(83.3%)  | 2(16.7%)  | 1.85 (0.39-8.69) | 0.44    |

|                                      |                |            |           |                  |         |
|--------------------------------------|----------------|------------|-----------|------------------|---------|
| <b>Ever use of Alcohol</b>           | No             | 367(90.2%) | 40(9.8%)  | 1                | 1       |
|                                      | Yes            | 87(89.7%)  | 10(10.3%) | 1.06(0.51-2.19)  | 0.89    |
| <b>Ever use of Khat</b>              | No             | 417(92.3%) | 35(7.7%)  | 1                | 1       |
|                                      | Yes            | 37(71.2%)  | 15(28.8%) | 4.83(2.42-9.65)  | <0.001* |
| <b>Ever use of Tobacco</b>           | No             | 440(90.9%) | 44(9.1%)  | 1                | 1       |
|                                      | Yes            | 14(70.0%)  | 6(30.0%)  | 4.29(1.57-11.71) | 0.005*  |
| <b>Tobacco uses during pregnancy</b> | No             | 450(90.2%) | 49(9.8%)  | 1                | 1       |
|                                      | Yes            | 4(80.0%)   | 1(20.0%)  | 2.30(0.25-20.95) | 0.46    |
| <b>Alcohol uses during pregnancy</b> | No             | 432(91.3%) | 41(8.7%)  | 1                | 1       |
|                                      | Yes            | 22(71.0%)  | 9(29.0%)  | 4.31(1.86-9.97)  | 0.001*  |
| <b>khat use during pregnancy</b>     | No             | 420(91.5%) | 39(8.5%)  | 1                | 1       |
|                                      | Yes            | 34(75.6%)  | 11(24.4%) | 3.48(1.64-7.41)  | 0.001*  |
| <b>Time spent in TV watching</b>     | Less than 2hrs | 181(87.4%) | 26(12.6%) | 1                | 1       |
|                                      | 2hrs & above   | 273(91.9%) | 24(8.1%)  | 0.61(0.34-1.09)  | 0.100*  |

Notes: Other with whom living now: = relatives, other occupations of father: = private employee, NGO sector employee, and pastor. \* Factors that have association at p-value <0.25 1= reference category, COR = Crude odds ratio
